# Supplementary material for: Hydrated forms of fluoroacetic acid: a rotational study
Source: Royal Society of Chemistry journal article supplement (doi:10.1039/c6cp04735a), 2016-01-01
Supplement: c6cp04735a1.pdf [file c6cp04735a1.pdf]

## Hydrated forms of fluoroacetic acid: a rotational study.

### Electronic Supplementary Information

Content:

- Tables of experimental transition frequencies of all measured isotopomers of FAA-W.
- Table of MP2/6-311++G(d,p) principal axes coordinates (Å) of of the not observed isomer, *cis-anti* FAA-W.

Table S1: Experimental transition frequencies ( $\nu$ , MHz) and observed minus calculated values ( $\Delta\nu$ , kHz) of *trans*-FAA-W

| $J'_{Ka'Kc'}$   | $J''_{Ka''Kc''}$ | H <sub>2</sub> O |                  | H <sub>2</sub> O <sup>18</sup> |                  | DOD        |                  | DOH        |                  |
|-----------------|------------------|------------------|------------------|--------------------------------|------------------|------------|------------------|------------|------------------|
|                 |                  | $\nu$ /MHz       | $\Delta\nu$ /kHz | $\nu$ /MHz                     | $\Delta\nu$ /kHz | $\nu$ /MHz | $\Delta\nu$ /kHz | $\nu$ /MHz | $\Delta\nu$ /kHz |
| 3 <sub>13</sub> | 2 <sub>12</sub>  | 8487.9817        | -2               | 8096.3289                      | -4               | 7994.593   | -5               | 8286.5524  | -2               |
| 3 <sub>03</sub> | 2 <sub>02</sub>  | 8809.3698        | -0               | 8390.1234                      | -6               | 8289.352   | -5               | 8603.5349  | -3               |
| 3 <sub>12</sub> | 2 <sub>11</sub>  | 9165.5662        | -3               | 8712.5361                      | -7               | 8614.306   | -11              | 8955.6620  | -6               |
| 3 <sub>22</sub> | 2 <sub>21</sub>  | 8830.0356        | 3                |                                |                  |            |                  |            |                  |
| 3 <sub>21</sub> | 2 <sub>20</sub>  | 8850.6510        | -4               |                                |                  |            |                  |            |                  |
| 4 <sub>04</sub> | 3 <sub>03</sub>  | 11721.8394       | -2               | 11167.0945                     | -4               | 11031.654  | 0                | 11447.1756 | 4                |
| 4 <sub>14</sub> | 3 <sub>13</sub>  | 11311.4212       | -1               | 10790.2464                     | -4               | 10654.344  | 0                | 11042.8013 | 4                |
| 4 <sub>13</sub> | 3 <sub>12</sub>  | 12214.5058       | 0                | 11611.5895                     | -4               | 11480.336  | 10               | 11934.5824 | 5                |
| 4 <sub>23</sub> | 3 <sub>22</sub>  | 11769.3138       | 7                |                                |                  |            |                  |            |                  |
| 4 <sub>22</sub> | 3 <sub>21</sub>  | 11820.7459       | -9               |                                |                  |            |                  |            |                  |
| 5 <sub>05</sub> | 4 <sub>04</sub>  | 14614.1362       | 1                | 13927.4058                     | 0                | 13756.400  | 1                |            |                  |
| 5 <sub>15</sub> | 4 <sub>14</sub>  | 14130.0288       | 1                | 13480.1613                     | -3               | 13309.880  | 6                | 13794.1686 | -3               |
| 5 <sub>14</sub> | 4 <sub>13</sub>  | 15257.8670       | 1                |                                |                  |            |                  |            |                  |
| 6 <sub>06</sub> | 5 <sub>05</sub>  | 17482.0429       | -1               | 16667.4587                     | 8                |            |                  | 17069.1842 | -1               |
| 6 <sub>16</sub> | 5 <sub>15</sub>  | 16942.8652       | -1               | 16165.2762                     | 4                |            |                  |            |                  |
| 6 <sub>15</sub> | 5 <sub>14</sub>  | 18293.9708       | 1                | 17394.6561                     | 7                |            |                  |            |                  |
| 1 <sub>11</sub> | 0 <sub>00</sub>  | 10245.8852       | 2                | 10162.4517                     | 0                |            |                  |            |                  |
| 2 <sub>12</sub> | 1 <sub>01</sub>  | 12963.3410       | 2                | 12759.3953                     | -0               |            |                  |            |                  |
| 3 <sub>13</sub> | 2 <sub>02</sub>  | 15569.8009       | -2               |                                |                  |            |                  |            |                  |
| 4 <sub>14</sub> | 3 <sub>03</sub>  | 18071.8527       | 1                |                                |                  |            |                  |            |                  |
| 5 <sub>05</sub> | 4 <sub>14</sub>  | 8264.1227        | 1                |                                |                  |            |                  |            |                  |
| 6 <sub>06</sub> | 5 <sub>15</sub>  | 11616.1366       | 1                |                                |                  |            |                  |            |                  |

Table S2: Experimental transition frequencies ( $\nu$ , MHz) and observed minus calculated values ( $\Delta\nu$ , kHz) of *cis*-FAA-W

| $J'_{Ka'Kc'}$   | $J''_{Ka''Kc''}$ | H <sub>2</sub> O |                  | H <sub>2</sub> <sup>18</sup> O |                  |
|-----------------|------------------|------------------|------------------|--------------------------------|------------------|
|                 |                  | $\nu$ /MHz       | $\Delta\nu$ /kHz | $\nu$ /MHz                     | $\Delta\nu$ /kHz |
| 3 <sub>13</sub> | 2 <sub>12</sub>  | 8660.4889        | -2               | 8261.9525                      | -3               |
| 3 <sub>03</sub> | 2 <sub>02</sub>  | 9017.3176        | 0                | 8589.3066                      | -1               |
| 3 <sub>12</sub> | 2 <sub>11</sub>  | 9422.0111        | -3               | 8956.2675                      | -7               |
| 3 <sub>22</sub> | 2 <sub>21</sub>  | 9045.6853        | 3                |                                |                  |
| 3 <sub>21</sub> | 2 <sub>20</sub>  | 9074.0587        | -4               |                                |                  |
| 4 <sub>04</sub> | 3 <sub>03</sub>  | 11990.1769       | -2               | 11425.1292                     | -2               |
| 4 <sub>14</sub> | 3 <sub>13</sub>  | 11539.2816       | -1               | 11009.2583                     | -4               |
| 4 <sub>13</sub> | 3 <sub>12</sub>  | 12554.0515       | 0                | 11934.5660                     | -4               |
| 4 <sub>23</sub> | 3 <sub>22</sub>  | 12055.3468       | 7                |                                |                  |
| 4 <sub>22</sub> | 3 <sub>21</sub>  | 12126.0364       | -9               |                                |                  |
| 5 <sub>05</sub> | 4 <sub>04</sub>  | 14935.6160       | 1                |                                |                  |
| 5 <sub>15</sub> | 4 <sub>14</sub>  |                  |                  | 13751.1177                     | -2               |
| 5 <sub>14</sub> | 4 <sub>13</sub>  | 15678.3108       | 1                | 14906.4773                     | 6                |
| 6 <sub>06</sub> | 5 <sub>05</sub>  | 17848.4422       | -1               | 17023.7049                     | -10              |
| 6 <sub>16</sub> | 5 <sub>15</sub>  |                  |                  | 16486.5006                     | 1                |
| 6 <sub>15</sub> | 5 <sub>14</sub>  | 17276.1003       | -1               |                                |                  |
| 1 <sub>11</sub> | 0 <sub>00</sub>  | 9691.1949        | 2                | 9590.2055                      | 1                |
| 2 <sub>12</sub> | 1 <sub>01</sub>  | 12452.5426       | 2                | 12229.6626                     | -1               |
| 3 <sub>13</sub> | 2 <sub>02</sub>  | 15089.6530       | -2               |                                |                  |
| 4 <sub>14</sub> | 3 <sub>03</sub>  | 17611.6199       | 1                |                                |                  |
| 5 <sub>24</sub> | 4 <sub>23</sub>  | 15060.2378       | 11               |                                |                  |
| 5 <sub>23</sub> | 4 <sub>22</sub>  | 15200.6308       | -7               |                                |                  |
| 5 <sub>05</sub> | 4 <sub>14</sub>  | 9314.1839        | 8                |                                |                  |
| 6 <sub>06</sub> | 5 <sub>15</sub>  | 12751.0651       | -4               |                                |                  |

Table S3: MP2/6-311++G(d,p) calculated principal axes coordinates ( $\text{\AA}$ ) of *cis-anti*-W

| atom | X         | Y         | Z         |
|------|-----------|-----------|-----------|
| C    | -0.675837 | -1.184696 | -0.107625 |
| F    | 0.687789  | -1.387928 | 0.100438  |
| C    | -1.079230 | 0.282628  | -0.003276 |
| O    | -0.115194 | 1.198570  | 0.064967  |
| O    | -2.255390 | 0.561963  | -0.005256 |
| H    | 0.783795  | 0.813038  | 0.019863  |
| H    | -1.229095 | -1.748962 | 0.643315  |
| H    | -0.927959 | -1.545709 | -1.106610 |
| H    | 2.884475  | -0.212394 | 0.178882  |
| O    | 2.574458  | 0.654070  | -0.098332 |
| H    | 3.185015  | 1.276968  | 0.304614  |
